# Supplementary material
Source: Springer Nature journal article supplement (https://www.springermedizin.de/resource/supplementary/12891_2008_481_MOESM5_ESM.pdf/9511532)

Review: Laser tendinopathy  
 Comparison: 05 Lateral elbow tendinopathy pain  
 Outcome: 01 Pain reduction on 100 mm VAS at end of study

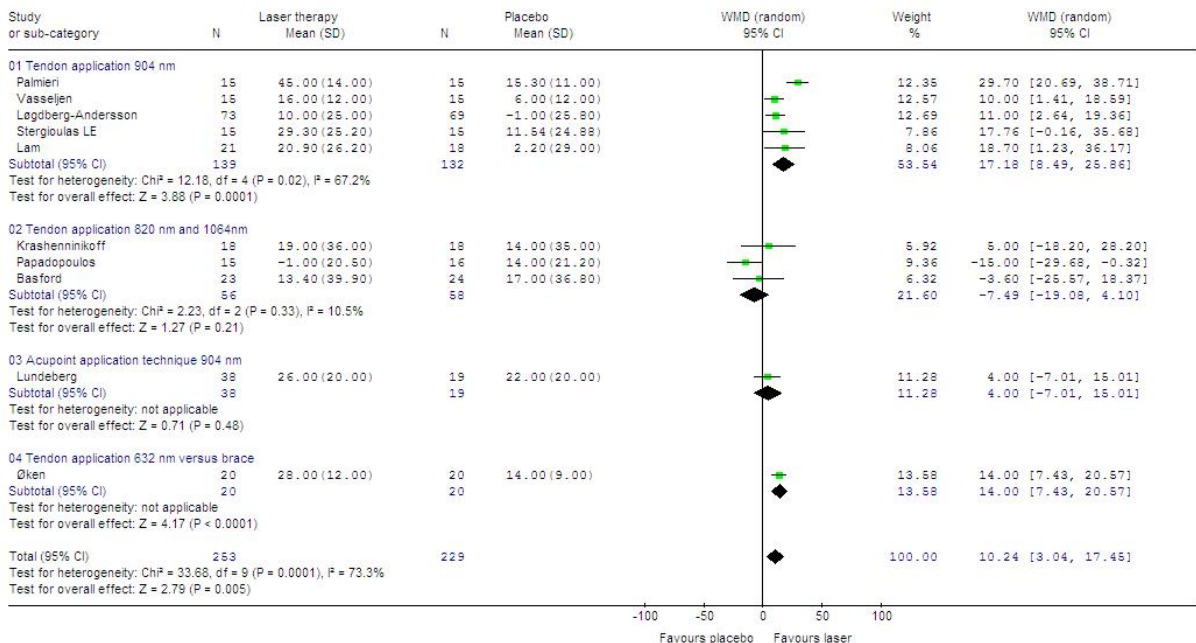

Supplement: MOESM5 [file 9511532]
